# Morphological and molecular characterization of *Aquaticheirospora* and phylogenetics of Massarinaceae (Pleosporales)

RAMPAI KODSUEB<sup>1</sup>, SAISAMORN LUMYONG<sup>1</sup>, WAI H. HO<sup>2</sup>, KEVIN D. HYDE<sup>2</sup>, ERIC H. C. MCKENZIE<sup>3</sup> and RAJESH JEEWON<sup>2\*</sup>

<sup>1</sup>Department of Biology, Faculty of Science, Chiang Mai University, Chiang Mai 50200, Thailand

<sup>2</sup>Division of Microbiology, School of Biological Sciences, University of Hong Kong, Pokfulam Road, Hong Kong, China

<sup>3</sup>Landcare Research, Private Bag 92170, Auckland, New Zealand

Received August 2006; accepted for publication May 2007

A morphologically interesting hyphomycete was collected from submerged wood in a stream in Doi Suthep-Pui National Park, Thailand. It is described as *Aquaticheirospora lignicola* gen. and sp. nov., and is characterized by euseptate conidia with divergent arms, which are vertically inserted in different planes to a basal cell. The genus differs from other chirosporous genera in having synnematosus conidioma and conidia that are produced on conidiogenous cells borne at the apices of synnemata. The morphological characterization of this new fungus is reported and compared with similar chirosporous genera. To investigate the teleomorphic and phylogenetic relationships of this new taxon, three different regions of the ribosomal gene [18S rDNA, 28S rDNA, and internal transcribed spacer (ITS) including 5.8S] were sequenced and analysed. The results of phylogenetic analyses based on 18S, 28S, and partial ITS including 5.8S rDNA, employing different tree-making methods, indicate that *Aquaticheirospora lignicola* is closely related to the ascomycetes family Massarinaceae (Order: Pleosporales). The Massarinaceae as currently circumscribed is monophyletic. *Massarina australiensis* and *M. bipolaris*, however, appear to belong to the Lophiostomataceae. © 2007 The Linnean Society of London, *Botanical Journal of the Linnean Society*, 2007, 155, 283–296.

ADDITIONAL KEYWORDS: chirosporous fungi – fungi on wood – new genus – rDNA – saprobic fungi – systematics.

## INTRODUCTION

Freshwater fungi represent a ubiquitous and diverse group of organisms, which colonize substrates found in aquatic or semi-aquatic environments (Luo *et al.*, 2004; Fryar *et al.*, 2005; Pascoal, Marvanová & Cássio, 2005; Sakayaroj, Phongpaichit & Jones, 2005; Vijaykrishna & Hyde, 2006). They appear to be taxonomically diverse, and flourish in various ecological niches (Shearer, 1993; Goh & Hyde, 1996; Gönzöl & Révay, 2003, 2004; Fryar *et al.*, 2004a, b). So far, more than 1000 freshwater fungi have been documented and

many more are being discovered as new habitats are being explored (Jeewon *et al.*, 2003b; Tsui, Goh & Hyde, 2003; Tsui, Hodgkiss & Hyde, 2003; Ho, Hyde & Hodgkiss, 2004; Kodsueb *et al.*, 2004; Tsui & Hodgkiss, 2004; Tsui & Hyde, 2004). Several novel and interesting fungi have been described from submerged wood in freshwater environments in both tropical and subtropical countries (Cai *et al.*, 2003a, b; Fryar & Hyde, 2004; Luo *et al.*, 2004; Tsui & Hyde, 2004). Recent fungal biodiversity studies in Thailand have also resulted in a number of new fungal taxa from aquatic habitats (Pinnoi *et al.*, 2004; Pinruan *et al.*, 2004a, b). During the examination of freshwater fungi occurring on submerged wood in Doi Suthep-Pui National Park, Thailand, we collected an unusual synnematosus

\*Corresponding author. E-mail: rrjeewon@hku.hk; rjeewon@graduate.hku.hk

chirosporous hyphomycete. *Aquaticheirospora lignicola* gen. et sp. nov. is described and illustrated with interference light micrographs, and compared with similar genera. A synopsis of morphological characters of chirosporous genera is provided. In this study, we also determine the phylogenetic relationships of our new taxon based on three sequence data sets [18S rDNA, 28S rDNA, and internal transcribed spacer (ITS) including 5.8S] to establish its teleomorphic affinities with known ascomycetes.

## MATERIAL AND METHODS

### COLLECTION AND PHENOTYPIC CHARACTERIZATION

Submerged wood (unidentified wood) was collected from a stream in Doi Suthep-Pui National Park, Chiang Mai, Thailand, during the rainy season of 2003. Samples were returned to the laboratory in individual plastic bags. High humidity was maintained by the addition of a paper towel moistened with sterile distilled water. Samples were incubated under ambient laboratory conditions (25–28 °C, fluctuating daylight, and fluorescent light conditions) and were examined microscopically for the presence of microfungi after 4–5 days and periodically for up to 1 month. Cultures of fungi were obtained where possible from single spore isolation (Choi, Hyde & Ho, 1999). Herbarium specimens and living cultures were deposited in The Hong Kong University Culture Collection (HKUCC).

### DNA EXTRACTION AND POLYMERASE CHAIN REACTION (PCR)

Total genomic DNA was extracted from mycelial cultures grown on potato dextrose agar (PDA) following a 2 × cetyltrimethylammonium bromide (CTAB) protocol (Jeewon, Liew & Hyde, 2004; Cai, Jeewon & Hyde, 2005). Partial sequences from three different regions of the rDNA molecule (characterized by different rates of evolution) were amplified. Primers pairs NS1 (5'-GTAGTCATATGCTTGTCTC-3') and NS4 (5'-CTTCCGTCAATTCCTTTAAG-3'), as defined by White *et al.* (1990), were used to amplify a region spanning approximately 1200 nucleotides from the small subunit (18S) of rDNA. LROR (5'-ACCCGCTGAACCTTAAGC-3') and LRO5 (5'-TCCTGAGG GAACTTCG-3') primer pairs, as defined by Vilgalys & Hester (1990), were used to amplify a segment of the large 28S subunit (about 950 nucleotides). In addition, primer pairs ITS4 (5'-TCCTCCGCTTAT TGATATGC-3') and ITS5 (5'-GGAAGTAAAAGTC GTAACAAGG-3'), as defined by White *et al.* (1990), were used to generate about 600 nucleotides from the complete ITS (including 5.8S) regions. The amplifica-

tion conditions were performed in a 50- $\mu$ l reaction volume as follows: 1 × PCR buffer, 0.2 mM each dNTP, 0.3  $\mu$ M of each primer, 1.5 mM MgCl<sub>2</sub>, 0.8 units Taq Polymerase, and 10 ng DNA. PCR parameters for all the regions were as follows: initial denaturation at 94 °C for 3 min, 30 cycles of 94 °C for 1 min, 52 °C for 50 s, and 72 °C for 1 min, and final extension of 72 °C for 10 min. The characterization of PCR products was performed via agarose gel electrophoresis on a TAE 1% agarose gel containing ethidium bromide as the staining agent. DNA sequencing was performed using the primers as mentioned above in an Applied Biosystems 3730 DNA Analyser at the Genome Research Centre (University of Hong Kong). The novel rDNA sequences have been deposited in GenBank under accession numbers AY736377 (18S rDNA), AY736378 (28S rDNA), and AY864770 (ITS and 5.8S rDNA). The accession numbers of the other sequences used to construct the phylogenetic trees are shown in Table 1.

### DATA ANALYSIS

Partial sequences from the 18S, 28S, and complete ITS regions, generated from the different primer sets, were assembled using Bioedit (Hall, 1999) and ClustalX (Thompson *et al.*, 1997). Alignments were checked and then manually edited where necessary. Sequence homologies were analysed using BLAST to facilitate the selection of other fungal members to be used in the analyses. Phylogenetic analyses were performed using PAUP\* 4.0b10 (Swofford, 2002). For maximum parsimony (MP) analyses, characters were unordered and weighted equally and differentially. Trees were inferred using the heuristic search option with 10, 100, and 1000 random sequence additions. Gaps were treated as missing data and fifth character to increase the probability of finding all the most-parsimonious trees and to compare tree topologies (as outlined by Jeewon, Liew & Hyde, 2002, 2004; Jeewon *et al.*, 2003a, b). Clade stability was assessed in a bootstrap analysis with 1000 replicates. For maximum likelihood (ML) analyses, a single tree generated under the MP criterion was used as a starting tree, and transition–transversion ratios, base frequencies, and shape parameter were estimated. Using these initial estimates of substitution rates and kinds, a heuristic search with tree bisection–reconnection (TBR) branch swapping was used to find the ML tree. The gamma model of site rate variation was used with no enforcement of a molecular clock. Initial branch lengths were obtained using Rogers–Swofford approximation methods. Neighbour-joining (NJ) analysis was carried out under different models of distance algorithms, including HKY85, JC, K2P, and F81, and the support

**Table 1.** Fungal taxa and GenBank accession numbers for rDNA sequences used in the phylogenetic analyses

| Ingroups (18S)                           | 18S rDNA | Ingroups (28S)                                 | 28S rDNA | Ingroups (ITS)                       | ITS, 5.8S |
|------------------------------------------|----------|------------------------------------------------|----------|--------------------------------------|-----------|
| <i>Aquaticheirosora lignicola</i>        | AY736377 | <i>Aquaticheirosora lignicola</i>              | AY736378 | <i>Aquaticheirosora lignicola</i>    | AY864770  |
| <i>Cochliobolus sativus</i>              | U42479   | <i>Bimuria novae-zelandiae</i>                 | AY016356 | <i>Alternaria helianthi</i>          | AY154713  |
| <i>Cucurbitodithis pityophila</i>        | U42480   | <i>Cochliobolus heterostrophus</i>             | AY544645 | <i>Alternaria leucanthemi</i>        | AY372684  |
| <i>Helicascus kanaloanus</i>             | AF053729 | <i>Curvularia brachyspora</i>                  | AF279380 | <i>Helminthosporium chlorophorae</i> | AF120259  |
| <i>Helminthosporium solani</i>           | AF120253 | <i>Didymella cucurbitacearum</i>               | AY293792 | <i>Helminthosporium solani</i>       | AF073919  |
| <i>Helminthosporium velutinum</i>        | AF120254 | <i>Dothidea ribesia</i>                        | AY016360 | <i>Helminthosporium solani</i>       | AF145703  |
| <i>Keissleriella cladophila</i>          | AF164360 | <i>Dothidea sambuci</i>                        | AY544681 | <i>Helminthosporium velutinum</i>    | AF145704  |
| <i>Kirschsteiniothelia elaterascus</i>   | AF053727 | <i>Helicomycetes roseus</i>                    | AY787932 | <i>Leptosphaeria biglobosa</i>       | AJ550892  |
| <i>Leptosphaeria maculans</i>            | U04238   | <i>Karstenula rhodostoma</i>                   | AY787933 | <i>Leptosphaeria maculans</i>        | M96663    |
| <i>Leptosphaeria microscopica</i>        | U04235   | <i>Letendraea eurotioides</i>                  | AY787935 | <i>Massarina armatispora</i>         | AF383955  |
| <i>Letendraea helminthicola</i>          | AY016345 | <i>Letendraea helminthicola</i>                | AY016362 | <i>Massarina bipolaris</i>           | AF383956  |
| <i>Lophiostoma caulium</i>               | AF164362 | <i>Macroventuria anomochaeta</i>               | AY787936 | <i>Massarina corticola</i>           | AF383957  |
| <i>Lophiostoma crenatum</i>              | U42485   | <i>Massarina arundinacea</i>                   | DQ813509 | <i>Massarina eburnea</i>             | AF383959  |
| <i>Massarina arundinacea</i>             | DQ813513 | <i>Massarina phragmaticola</i>                 | DQ813510 | <i>Massarina fronisubmersa</i>       | AF383960  |
| <i>Massarina australiensis</i>           | AF164364 | <i>Phaeosphaeria avenaria</i>                  | AY544684 | <i>Massarina ramunculicola</i>       | AF383962  |
| <i>Massarina bipolaris</i>               | AF164365 | <i>Phoma herbarum</i>                          | AF382386 | <i>Massarina rubi</i>                | AF383963  |
| <i>Massarina eburnea</i>                 | AF164366 | <i>Pleospora herbarum</i> var. <i>herbarum</i> | AY293791 | <i>Neophaeosphaeria barrii</i>       | AF466303  |
| <i>Massarina igniaria</i>                | DQ813511 | <i>Pleospora ambigua</i>                       | AY787937 | <i>Paraphaeosphaeria solitaria</i>   | AF466301  |
| <i>Massarina phragmaticola</i>           | DQ813512 | <i>Preussia terricola</i>                      | AY544686 | <i>Phaeoseptoria musae</i>           | AF439469  |
| <i>Massariosphaeria phaeospora</i>       | AF164368 | <i>Pyrenophora tritici-repentis</i>            | AY544672 | <i>Phaeosphaeria avenaria</i>        | U77357    |
| <i>Montagnula opulenta</i>               | AF164370 | <i>Repetophragma ontariense</i>                | DQ408575 | <i>Phaeosphaeria caricicola</i>      | AF439474  |
| <i>Ophiobolus herpotrichus</i>           | U43453   | <i>Setomelanomma holmii</i>                    | AF525678 | <i>Phaeosphaeria oryzae</i>          | AF439495  |
| <i>Paraphaeosphaeria conglomerata</i>    | AF250824 | <i>Setosphaeria monoceras</i>                  | AY016368 | <i>Phaeosphaeria pleurospora</i>     | AF439498  |
| <i>Paraphaeosphaeria glauco-punctata</i> | AF250819 | <i>Spirosphaera cupreorufescens</i>            | AY616238 | <i>Phaeosphaeria</i> sp.             | AY345346  |
| <i>Paraphaeosphaeria michotii</i>        | AF250817 | <i>Sporidesmiella fusiformis</i>               | DQ408577 | <i>Phoma tracheiphila</i>            | AF272554  |
| <i>Paraphaeosphaeria pilleata</i>        | AF250821 | <i>Stylodothis puccinioides</i>                | AY004342 | <i>Pleospora herbarum</i>            | AY329169  |
| <i>Paraphaeosphaeria quadriseptata</i>   | AF250826 | <i>Thaxteriella helicoma</i>                   | AY787939 | <i>Saccharicola bicolor</i>          | AF455415  |
| <i>Phaeosphaeria avenaria</i>            | AY544725 | <i>Trematosphaeria heterospora</i>             | AY016369 | <i>Saccharicola taiwanensis</i>      | AF439464  |

**Table 1.** *Continued*

| Ingroups (18S)                 | 18S rDNA | Ingroups (28S)                  | 28S rDNA | Ingroups (ITS)              | ITS, 5.8S |
|--------------------------------|----------|---------------------------------|----------|-----------------------------|-----------|
| <i>Pleospora betae</i>         | U43466   | <i>Tubeufia amazonensis</i>     | AY787938 | <i>Stemphylium herbarum</i> | AF071344  |
| <i>Pleospora herbarum</i>      | DQ247812 | <i>Westerdykella cylindrica</i> | AY004343 | <b>ITS outgroups</b>        |           |
| <i>Pyrenophora trichostoma</i> | U43459   | <b>LSU outgroup</b>             |          | <i>Apiosporina morbosa</i>  | AY166451  |
| <i>Saccharicola bicolor</i>    | U04202   | <i>Mycosphaerella suttoniae</i> | AF309587 | <i>Botryosphaeria</i> sp.   | AY513947  |
| <i>Septoria nodorum</i>        | U04236   |                                 |          | <i>Venturia inopina</i>     | AY177406  |
| <i>Setomelanomma holmii</i>    | AY161121 |                                 |          |                             |           |
| <b>SSU outgroups</b>           |          |                                 |          |                             |           |
| <i>Dothidea ribesia</i>        | AY016343 |                                 |          |                             |           |
| <i>Dothidea sambuci</i>        | AY544722 |                                 |          |                             |           |

**Figure 1.** Micrographs of *Aquaticheirospora lignicola* (from holotype). A, Synnemata on host tissue. B, Synnemata formed in culture. C, Synnema from host tissue. D, E, Conidia of synnema from host tissue. F, G, Synnemata from culture. H–O, Conidia from synnema that formed in culture. Rhexolytic secession in D (arrowhead); conidiogenous cells in H–J (arrowhead); pore at the end of basal cell in K (arrowhead); formation of young conidium in L and M; brown vacuole in the apices of conidium in N (arrowhead). Bars: A, 200 µm; B, 150 µm; C, 100 µm; D, 30 µm; E, 15 µm; F, 45 µm; G, 50 µm; H–K, N–O, 25 µm; L, M, 15 µm.

for individual clades within the tree was assessed by 1000 replicates of bootstrapping. Bayesian analyses were performed as outlined in Shenoy *et al.* (2006) and not detailed here.

The Kishino–Hasegawa and Templeton tests were performed in order to determine whether the trees inferred under different optimality criteria were significantly different.

## RESULTS

### TAXONOMY

***Aquaticheirospora* Kodsueb & W. H. Ho, *gen. nov.***

Coloniae in substrato naturali effusae, solitaria, atrae. Conidiomata synnemata, erecta, brunnea. Mycelium in substrato immersum, hyalina vel pallide brunnea. Setae nullae. Cellulae conidiogenae in conidiophoris incorporatae, monoblasticae, terminales, determinatae, hyalina vel pallide brunneae, oblongae. Conidia acrogenosae, holoblasticae, gregaria, hyalina vel pallide brunneae ubi immatura, brunneae ad maturita, chiriodea, euseptata, verticalia; cellulae basillares pallide brunneae, cuneiformes-truncatae, laeves, tenuitunicatae; rami discreti, ramosi, plerumque divergenti, cylindrici. Conidiorum secessio rhexolytica.

*Etymology:* In reference to the freshwater habitat and shape of the conidia of the fungus.

Mycelium immersed in the substratum, hyaline to pale brown. Conidiomata synnema, erect, brown. Conidiogenous cells monoblastic, determinate, hyaline or pale brown, oblong. Conidia acrogenous, holoblastic, hyaline to pale brown when immature and brown when mature, chiroid, euseptate, arms vertically inserted in different planes, on a basal cell; basal cells pale brown, cuneiform truncate, smooth, thin-walled; arms discrete, mostly divergent, cylindrical. Conidial secession rhexolytic.

***Aquaticheirospora lignicola* Kodsueb & W. H. Ho, *sp. nov.* (Fig. 1)**

Coloniae in substrato naturali effusae, solitaria, atrae. Conidiomata synnemata, erect, 510 µm. Mycelium in substrato immersum, hyalina vel pallide brunnea. Cellulae conidiogenae in conidiophoris incorporatae, monoblastica, terminales, determinata, hyalina vel pallide brunnea, oblonga, 14.5 × 9.5 µm. Conidia acrogenosa, holoblastica, gregaria, hyalina vel pallide brunneae ubi immatura, brunneae ad maturita, chiriodea, 65–85(–100) × (16–)22–60(–75) µm ( $\bar{\chi} = 77 \times 41 \mu\text{m}$ ,  $N = 30$ ), euseptata, cum (3–)6–8(–10) rami praedita, verticalia; cellulae basillares pallide brunnea, cuneiforma-truncata, 8 × 7 µm ( $N = 10$ ), laevia, tenuitunicata; rami discreti, non



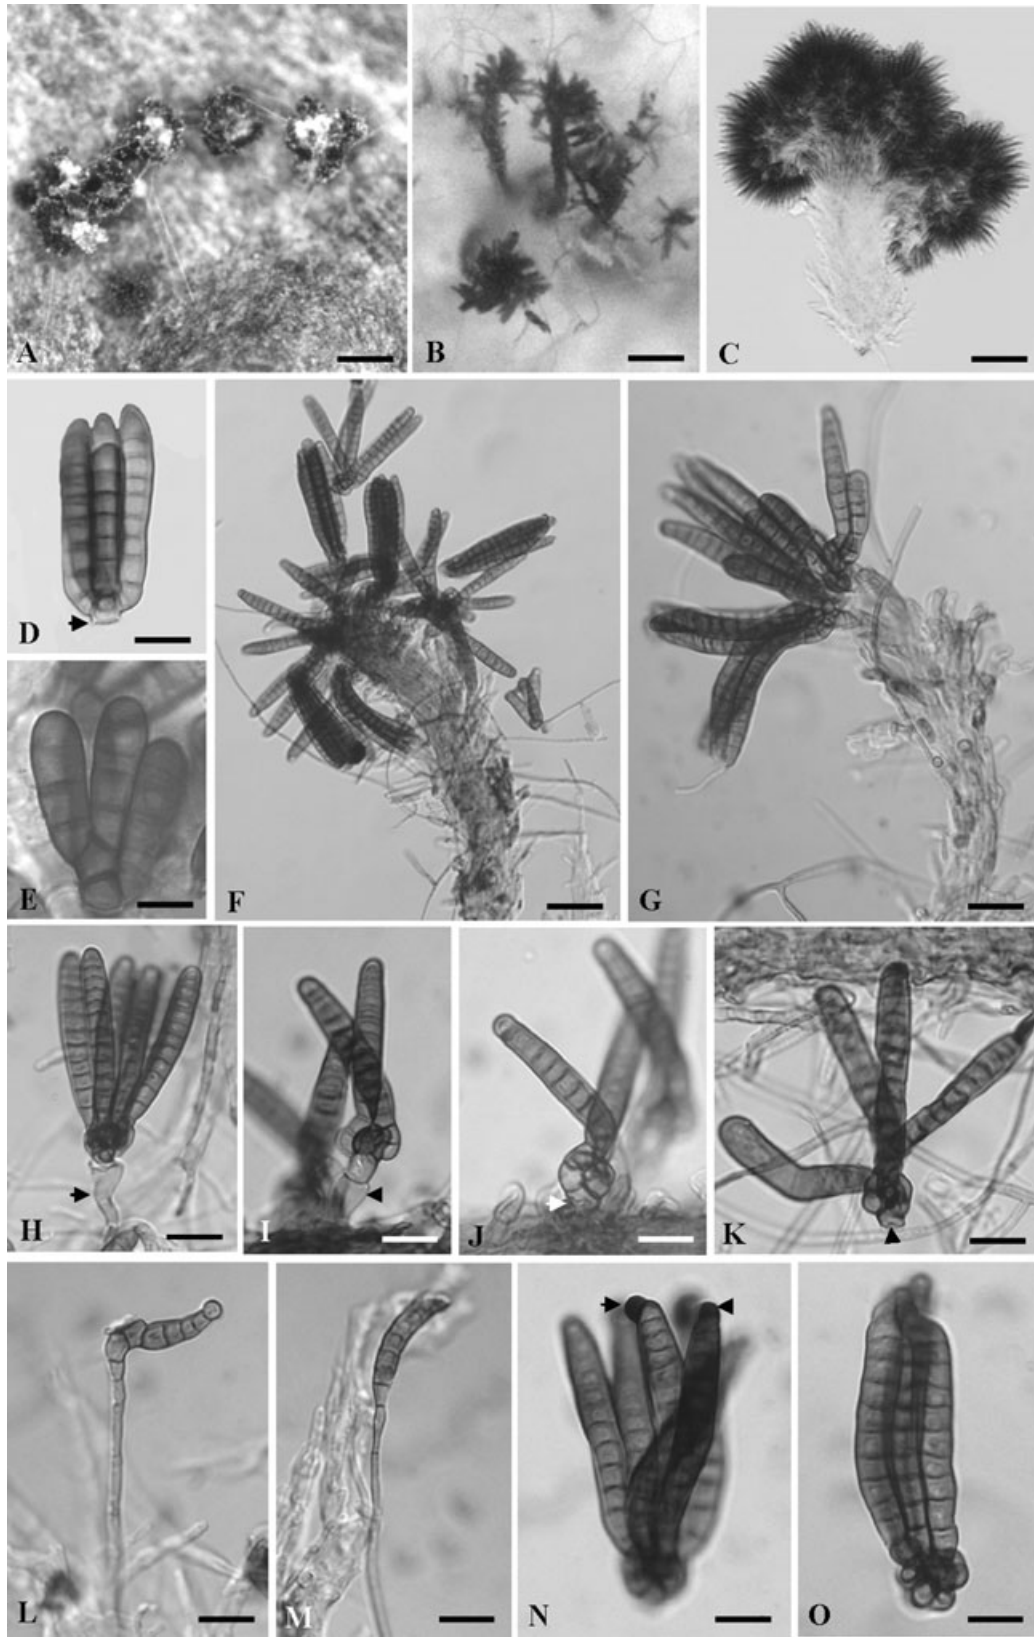

ramosi, divergenti, cylindrici (25–)55–75(–100) × 7–10(–15) µm ( $\bar{\chi}$  = 68 × 8.25 µm,  $N$  = 30) (4–)10–13(–17) euseptati. Conidiorum secessio rhexolytica.

*Etymology:* The name *lignicola* is derived from the words *lignum*, meaning wood, and *cola*, meaning habitat, referring to the habitat in which this fungus has been found.

Colonies on PDA, black at the centre, with a yellowish-white, thick periphery, edge smooth and slightly raised, underside yellow, reaching 1 cm in diameter after 1 week. Mycelium immersed in the substratum, hyaline to pale brown. Synnemata, erect, forming after 6 weeks, white to pale brown and becoming dark brown when mature, up to 510 µm long. Conidiogenous cells monoblastic, determinate, hyaline to pale brown, oblong, 14.5 × 9.5 µm. Conidia acrogenous, holoblastic, gregarious, hyaline to pale brown when immature, brown when mature, chiroid, 65–85(–100) × (16–)22–60(–75) µm ( $\bar{\chi}$  = 77 × 41 µm,  $N$  = 30), euseptate, with (3–)6–8(–10) arms vertically inserted in different planes, on a basal cell; basal cells pale brown, cuneiform truncate, 8 × 7 µm ( $N$  = 10), smooth, thin-walled; arms discrete, unbranched, mostly divergent, cylindrical (4–)10–13(–17) euseptate (25–)55–75(–100) × 7–10(–15) µm ( $\bar{\chi}$  = 68 × 8.25 µm,  $N$  = 30). Conidial secession rhexolytic.

*Teleomorph:* Unknown.

*Substratum:* Wood submerged in streams.

*Known distribution:* Thailand.

*Holotype:* THAILAND; Chiang Mai Province, Doi Suthep-Pui National Park, on submerged wood, 21.viii.2003, *R. Kodsueb* [HKU(M) 17493, isotype CMU026511. Living cultures ex holotype HKUCC 10304].

*Note:* The above descriptions are from material grown in culture on PDA. Slight differences in conidial characters were observed when the fungus was examined on the substrate. On the substrate, conidial arms were tightly packed, usually with 3(–5) often wider arms, whereas, in culture, conidia had (3–)5(–10) longer and narrower divergent arms, and the apical cell of some arms have a brown vacuole. The vacuole varied in shape from globose to irregular shape, some having rough ornamentation. The vacuole became larger when the conidia germinated.

#### PHYLOGENETIC ANALYSES

Partial 18S rDNA, 28S rDNA, and complete ITS regions amplified from *Aquaticheirosora lignicola*

were 1044, 881, and 548 nucleotides in length, respectively. The comparative sequence analysis based on BLAST search revealed sequence similarities of 92–97% to other bitunicates fungi, especially *Leptosphaeria*, *Massarina*, *Paraphaeosphaeria*, *Phaeosphaeria*, and *Pleospora* (order Pleosporales).

The 18S rDNA data set consisted of 36 taxa and 1059 characters. Unweighted MP analysis and treating gaps as missing data yielded 86 trees [total length (TL), 273; consistency index (CI), 0.656; retention index (RI), 0.833; rescaled consistency index (RC), 0.546; homoplasy index (HI), 0.344]. Weighted MP (with a transition–transversion ratio of 1.5 : 1) generated four trees, which were similar in topology and not significantly different from each other (TL, 331.5; CI, 0.671; RI, 0.840; RC, 0.564; HI, 0.329). The most parsimonious tree with bootstrap and Bayesian support on the branches is shown in Figure 2. Treating gaps as fifth character and ML analyses resulted in trees of identical topologies (results not shown). NJ analyses, however, yielded trees in which the major clades uniting different families were not fully resolved (results not shown).

The 28S data set of 31 taxa formed an aligned data matrix of 896 characters in length and consisted of 189 (21%) parsimony informative sites. Weighted MP (with a transition–transversion ratio of 1.75 : 1) produced only one tree (TL, 795.25; CI, 0.592; RI, 0.773; RC, 0.457; HI, 0.408; Fig. 3). Similar results were obtained with a transition–transversion ratio of 2 : 1 and unweighted parsimony. ML analyses yielded identical tree topologies with a  $-\ln$  likelihood of 4446.27919, shape parameter of 0.5626, and estimated base frequencies as follows: A, 0.2394; C, 0.2201; G, 0.3116; T, 0.2289 (results not shown). Bayesian values generated from Bayesian analyses are shown on the lower nodes.

Only 270 nucleotides were used in the ITS and 5.8S data set (entire 5.8S and the last 75 nucleotides of ITS1 and first 25 nucleotides from ITS2), as other regions were too variable and difficult to align. Both unweighted and weighted MP analyses resulted in one tree each, which were similar in topology and not statistically different. Figure 4 shows the tree generated from the unweighted parsimony (TL, 602.5; CI, 0.485; RI, 0.695; RC, 0.337; HI, 0.515). The bootstrap support based on 1000 replicates is shown on the upper nodes.

## DISCUSSION

### TAXONOMY

Morphologically, *Aquaticheirosora* is quite distinct from other anamorphic chirosporous genera. In addition to *Aquaticheirosora*, there are 27 other genera

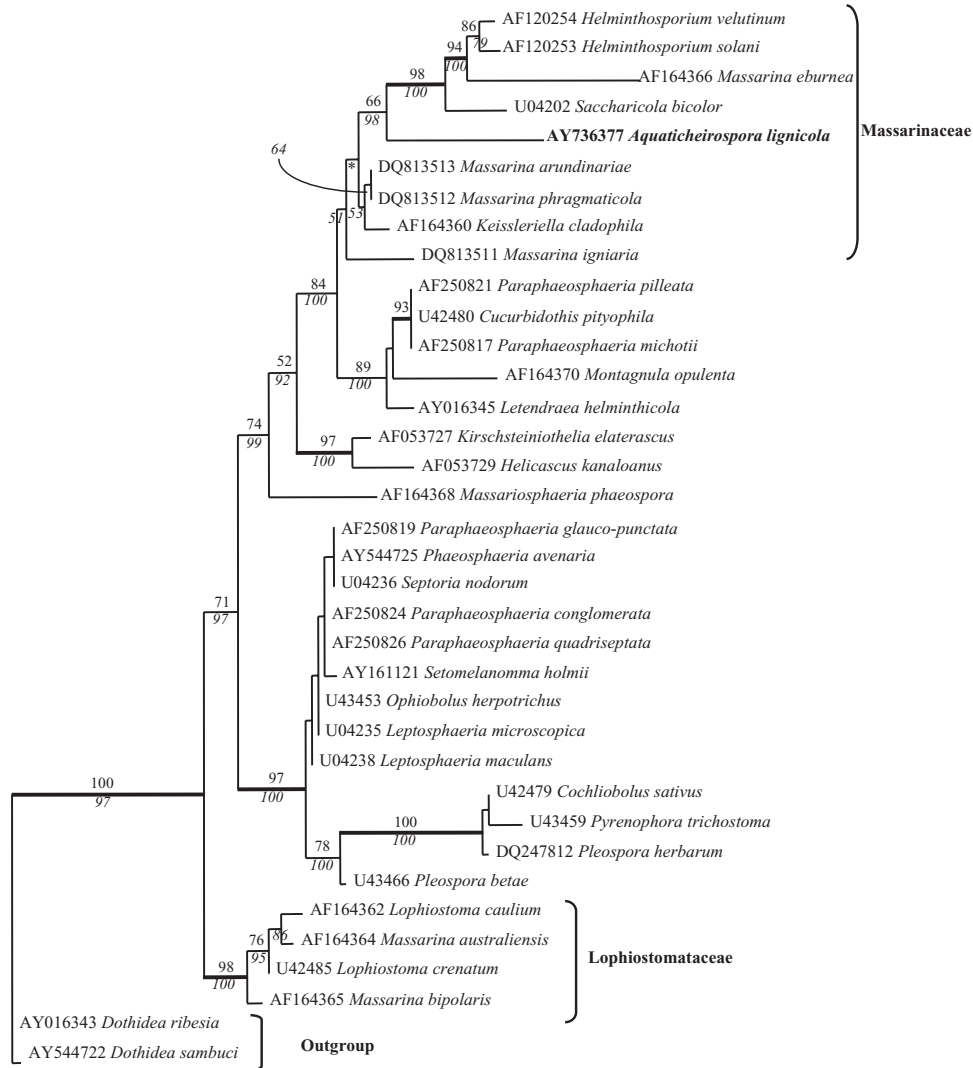

## 10

**Figure 2.** Maximum parsimony tree generated with the 18S rDNA data set [length, 273; consistency index (CI), 0.656; retention index (RI), 0.833; rescaled consistency index (RC), 0.546; homoplasy index (HI), 0.344]. Designated outgroups are *Dothidea ribesia* and *Dothidea sambuci*. Bootstrap support based on 1000 replicates for each clade is shown on the upper node and Bayesian support is shown on the lower node. The thickened lines represent bootstrap support above 90%.

that produce chiroid conidia (Ho, Hodgkiss & Hyde, 2000). Two of these genera (*Cheiromyces* and *Cheiromycina*) have distoseptate conidia, whereas all the others, including *Aquaticheirospora*, have euseptate conidia. *Aquaticheirospora* is unique in that the conidiomata are synnematosus.

*Aquaticheirospora* produces chirosporous conidia similar in appearance to those of species of *Cheiromyces*, *Chelisporium*, *Dictyosporium*, *Digitodesmium*, *Prostemium*, *Psammia*, *Sirothecium*, and *Tetranacrium*. However, these genera differ in the type of conidiomata: in *Aquaticheirospora*, conidia are pro-

duced on synnemata; in *Sirothecium*, *Prostemium*, and *Tetranacrium*, conidiomata are eustromatic; in *Cheiromyces*, *Dictyosporium*, and *Digitodesmium*, conidiomata are sporodochial; and, in *Psammia*, conidiomata are acervular. The conidia of *Aquaticheirospora* are released by rhexolytic secession that leaves a basal frill on the conidia (Fig. 1D), and is similar to conidial secession in *Cheiromyces* and *Dictyosporium* (Goh, 1999; Ho *et al.*, 2000). Most *Dictyosporium* conidia are complanate with tightly packed arms arranged in the same plane (Tsui *et al.*, 2006), whereas, in *Aquaticheirospora*, arms are arranged in

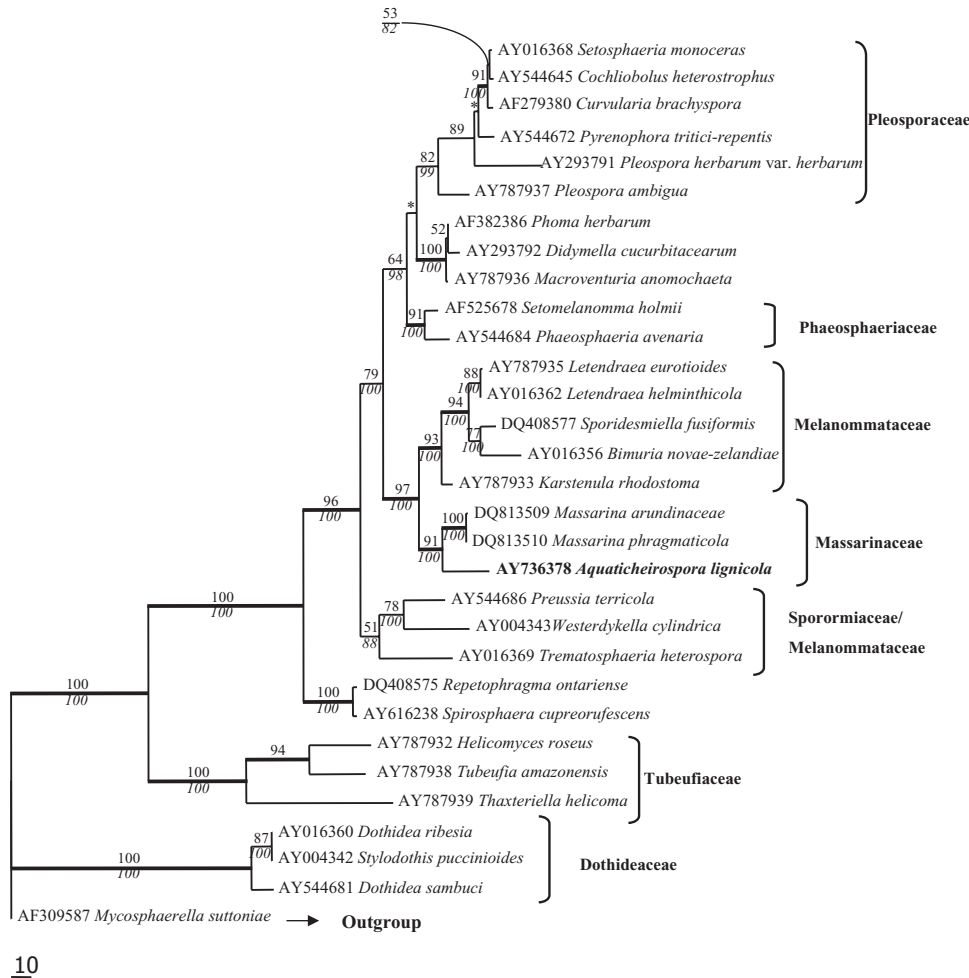

**Figure 3.** Maximum parsimony tree generated with the 28S rDNA data set [length, 795.25; consistency index (CI), 0.592; retention index (RI), 0.773; rescaled consistency index (RC), 0.457; homoplasy index (HI), 0.408]. Designated outgroup is *Mycosphaerella suttoniae*. Bootstrap support based on 1000 replicates for each clade is shown on the upper node and Bayesian support is shown on the lower node. The thickened lines represent bootstrap support above 90%.

different planes, as in *Cheiromyces*, *Digitodesmium*, and *Sirothecium* species. A synopsis of distinguishing characters of *Aquaticheirospora* and similar genera is given in Table 2.

#### PHYLOGENY OF *AQUATICHEIROSPORA LIGNICOLA* BASED ON rDNA SEQUENCE ANALYSES

Molecular data provide conclusive evidence to support the association of this new hyphomycete taxon with other teleomorphic genera in the Pleosporales. There were no conflicting results between the different data sets with respect to the phylogeny of *A. lignicola*. Phylogenies based on sequences generated from 18S rDNA and ITS regions suggest that *A. lignicola* is phylogenetically related to *Leptosphaeria bicolor* D.Hawksw., W.J.Kaiser & Ndimande (= *Saccharicola*

*bicolor*), *Massarina eburnea* (Tul. & C. Tul.) Sacc., and *Helminthosporium* species, which are all currently accommodated in the family Massarinaceae (Eriksson & Hawksworth, 2003). The family Massarinaceae (Pleosporales) was established by Munk (1956) to accommodate *Massarina*, which is characterized by aggregated, immersed to erumpent, pseudothecioid ascomata, cellular pseudoparaphyses, bitunicate cylindrical asci, and hyaline, fusiform to long ellipsoid ascospores with a mucilaginous sheath or appendages (Hyde, 1995; Aptroot, 1998). The family was synonymized to Lophiostomataceae (Barr, 1992; Kirk *et al.*, 2001). Recently, Massarinaceae was resurrected following the redescription of *Leptosphaeria bicolor* as a new genus (*Saccharicola*) and its phylogenetic affinities with *Keissleriella cladophila* (Niessl) Corbaz, *M. eburnea*, and the anamorphs *Helminthosporium*



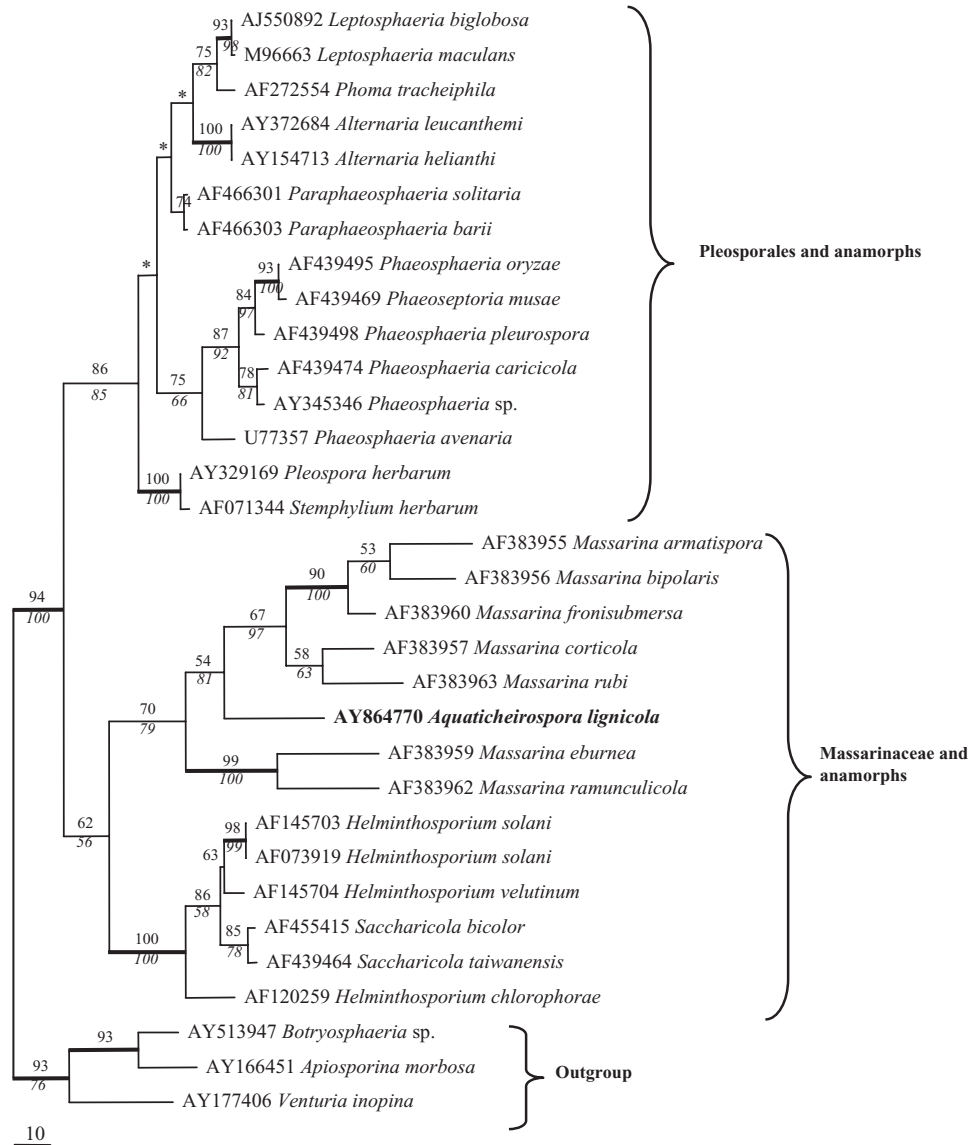

**Figure 4.** Tree generated from unweighted parsimony with the internal transcribed spacer (ITS) rDNA data set [length, 602.5; consistency index (CI), 0.485; retention index (RI), 0.695; rescaled consistency index (RC), 0.337; homoplasy index (HI), 0.515]. Designated outgroups are *Apiosporina morbosa*, *Botryosphaeria* sp., and *Venturia inopina*. Bootstrap support based on 1000 replicates for each clade is shown on the upper node and Bayesian support is shown on the lower node. The thickened lines represent bootstrap support above 90%.

*solani* Durieu & Mont. and *H. velutinum* G.K.Link based on 18S rDNA sequence analysis (Eriksson & Hawksworth, 2003). In this paper, we placed our new taxon in the family Massarinaceae as circumscribed by Eriksson & Hawksworth (2003). The phylogenetic relationships of this family in Pleosporales, based on morphology and molecular characters, have already been described by Oliver *et al.* (2000), Morales *et al.* (1995), and Eriksson & Hawksworth (2003), and are not detailed here. Basically, the molecular results

shown here are congruent with previously published phylogenies. *Aquaticheirospora lignicola* clusters with *S. bicolor* and with other members of the Massarinaceae with a bootstrap confidence of 66% (18S rDNA-based phylogeny; Fig. 2) and 54% (ITS-based phylogeny; Fig. 4). 28S rDNA phylogeny also supports the inclusion of *A. lignicola* within the Pleosporales, and its affinity with members of the family Massarinaceae is resolved with high bootstrap support (91%; Fig. 3). The three gene regions could not be analysed

**Table 2.** Characteristic comparison between *Aquatichirospora*, *Cheiromyces*\*, *Dictyosporium*†, *Digitodesmium*‡, *Prostemium*§, *Psammia*§, *Sirothecium*¶, and *Tetranacrium*§

|                      | <i>Aquatichirospora</i>                                                                         | <i>Cheiromyces</i>                                                                             | <i>Dictyosporium</i>                                                                                      | <i>Digitodesmium</i>                                                                            | <i>Sirothecium</i> /<br><i>Chelisporium</i>                                                                                        | <i>Prostemium</i>                                                                                   | <i>Psammia</i>                                                                        | <i>Tetranacrium</i>                                                          |
|----------------------|-------------------------------------------------------------------------------------------------|------------------------------------------------------------------------------------------------|-----------------------------------------------------------------------------------------------------------|-------------------------------------------------------------------------------------------------|------------------------------------------------------------------------------------------------------------------------------------|-----------------------------------------------------------------------------------------------------|---------------------------------------------------------------------------------------|------------------------------------------------------------------------------|
| Conidiomata          | Synnemata, erect                                                                                | Sporodochial, superficial                                                                      | Sporodochial, superficial                                                                                 | Sporodochial, superficial                                                                       | Eustromatic, unilocular, immersed to semi-immersed                                                                                 | Acervular to eustromatic                                                                            | Acervular, separate                                                                   | Eustromatic, subcuticular, becoming superficial, separate or gregarious      |
| Conidiophores        | Unbranched, septate, filiform, confined to the basal cell                                       | Absent                                                                                         | Micronematous, mononematous or absent                                                                     | Semi-macronematous, mononematous                                                                | Hyaline, repeatedly and irregularly branched, septate, vertically orientated, formed from the inner cells of the conidiomatal wall | Hyaline, unbranched, septate, filiform, confined to the basal cell                                  | Irregularly branched, septate, ramifying over the acervular tissue                    | Absent                                                                       |
| Conidiogenous cells  | Monoblastic, determinate                                                                        | Monoblastic, determinate                                                                       | Monoblastic, determinate                                                                                  | Monoblastic, determinate                                                                        | Monoblastic, integrated, apical, lateral or comprising the conidiophore                                                            | Holoblastic, integrated, determinate                                                                | Holoblastic, determinate, integrated                                                  | Holoblastic, discrete, determinate                                           |
| Conidia              | Solitary, holoblastic, euseptate, chiroid, arms inserted on the basal cells in different planes | Solitary, holoblastic, distoseptate, chiroid, arms inserted on basal cells in different planes | Solitary, holoblastic, euseptate, chiroid, branched from the base, in most species flattened in one plane | Solitary, holoblastic, euseptate, chiroid, with arms inserted on basal cells in different plane | Solitary, holoblastic, euseptate, chiroid, closely branched, with 2–4 vertical divergent arms inserted in different planes         | Smooth, consisting of 10–14, radiating, 2–3 transversely euseptate arms connected to a central cell | Smooth, up to 6 septate arms radiating from a central complex of short branched cells | Tetradiate, consisting of 1 vertical arm and 3 ± equidistant horizontal arms |
| Conidial basal cells | Truncate                                                                                        | Truncate                                                                                       | Truncate                                                                                                  | Truncate                                                                                        | Truncate                                                                                                                           | None                                                                                                | None                                                                                  | Truncate                                                                     |
| Conidial arms        | Discrete, unbranched, mostly divergent, cylindrical, euseptate                                  | Discrete, distoseptate, each arm with an inflated apical cell                                  | Tightly packed arms                                                                                       | Discrete, euseptate, mostly with a narrowed, recurved apical cell                               | Euseptate, slightly constricted at the septa, occasionally branched, apical cell obtuse                                            | Data not available                                                                                  | Data not available                                                                    | Arising from a central globose cell, euseptate, tapered towards the apex     |
| Conidial secession   | Rhexolytic                                                                                      | Rhexolytic                                                                                     | Rhexolytic                                                                                                | Schizolytic                                                                                     | Data not available                                                                                                                 | Data not available                                                                                  | Data not available                                                                    | Data not available                                                           |

\* Sutton (1985); Ho *et al.* (2000).

† Goh (1999).

‡ Kirk (1981); Ho, Hyde &amp; Hodgkiss (1999).

§ Sutton (1980).

¶ Morgan-Jones, Nag Raj &amp; Kendrick (1972); Sutton (1980, 1985).

in combination because of inadequate sequences available in GenBank for this group of fungi.

Phylogenies based on DNA sequence analyses have been shown to be important in the classification of many anamorphs and their integration with teleomorphs (Rehner & Samuels, 1995; Taylor, 1995; Jacobs & Rehner, 1998; Jeewon *et al.*, 2002; Shenoy *et al.*, 2006). In this study, the hypothesis that *A. lignicola* is the anamorph of a member of the Massarinaceae is assessed. Pairwise sequence alignment of the partial 18S rDNA gene (1059 nucleotides) reveals that *A. lignicola* shares 98% and 96% similarities to *Keissleriella cladophila* and *S. bicolor*, respectively. Massarinaceae is known to possess both coelomycetous and hyphomycetous anamorphs (Sivanesan, 1984; Shoemaker & Babcock, 1990). For instance, *M. tetraploa* Scheuer and *M. lacustris* (Fuckel) Leuchtm. have been linked to *Tetraploa aristata* Berk. & Broome (hyphomycete) and *Stagonospora* sp. (coelomycete), respectively. The anamorph of *M. eburnea* is still obscure, although it has been referred to *Ceratophoma*-like anamorphs, whereas *Keissleriella* is recognized to produce *Dendrophoma*-like anamorphs (Bose, 1961). *Saccharicola bicolor* has been linked to *Stagonospora*-like anamorphs, but a *Phoma*-like anamorph has also been reported (O'Neill & Farr, 1996; Venkatasubbaiah *et al.*, 1998; Eriksson & Hawksworth, 2003). *Helminthosporium* has been accepted as an anamorphic genus within the Pleosporales (Oliver *et al.*, 2000). In this study, *H. solani* and *H. velutinum*, both hyphomycetous taxa, belong to the Massarinaceae, as does *A. lignicola*. However, *Helminthosporium* spores superficially resemble *Bipolaris*, *Drechslera*, and *Exserohilum* spores and are distinct from those of *Aquaticheirospora*. Recently, a new coelomycetous genus, *Paraconiothyrium* (anamorph of *Paraphaeosphaeria*), characterized by pycnidial, unilocular conidiomata with circular and central ostiole, brown conidia, and conidiophores which are absent, was described and accommodated in the Pleosporales (Verkley *et al.*, 2004). Another recent phylogenetic study also indicated that other hyphomycetous fungi (including *Cheiromoniliophora*, *Dictyosporium*, *Digitodesmium*, *Kamatia*, and *Pseudodictyosporium*), sharing similar morphologies to *Aquaticheirospora*, also have affinities to the family Massarinaceae (Tsui *et al.*, 2006).

The phylogenies generated in this study also shed meaningful taxonomic insights into the systematics of *Massarina*. It is becoming increasingly evident that there are *Massarina* species that should be transferred to other families, such as Lophiostomataceae (Liew, Aptroot & Hyde, 2002; Vijaykrishna, 2005). 18S rDNA sequence analyses have shown that *M. australiensis* K.D.Hyde and *M. bipolaris* K.D.Hyde should be transferred to the Lophiostomataceae, and

that the family Massarinaceae should be circumscribed to include *Massarina*, *Keissleriella*, *Saccharicola*, *Helminthosporium*, and *Aquaticheirospora* for the time being. These two species are related to *Lophiostoma* species and, morphologically, they can only be distinguished on the basis of a slight difference in the ostiole. However, whether this character is phylogenetically significant in delineating the Lophiostomataceae and Massarinaceae is still obscure at present.

It appears that anamorphic characters have undergone convergent evolution and are phylogenetically insignificant in clarifying familial boundaries within the Pleosporales. Other anamorphic fungi, such as *Alternaria*, *Cladosporium*, *Curvularia*, *Fusicoccum*, *Coniothyrium*, *Pleurophomopsis*, *Stemphylium*, and *Titaea*, also have phylogenetic affinities to the Pleosporales and other bitunicate fungi (Guo *et al.*, 2004; Lee, Kim & Jung, 2005; Schubert & Braun, 2005; Tanaka, Harada & Barr, 2005; Kirschner & Piepenbring, 2006; Phillips *et al.*, 2006).

Molecular phylogenetics have helped to establish a number of anamorphic fungi to their teleomorphic counterparts, especially those which never produced any teleomorph in culture. For instance, Pinnoi *et al.* (2007) found that *Berkleasmiium*, a hyphomycete characterized by sporodocia conidioma and solitary brown and muriform conidia with rounded ends, is related to other loculoascomycetes. The genus *Sporidesmium* and allies have been shown to be polyphyletic, and *Sporidesmiella fusiformis* W.P.Wu, *Sporidesmium tengii* W.P.Wu, *Sporidesmium obclavatum* (Bubák & Syd.) Subram., *Sporidesmium australiense* M.B.Ellis, *Sporidesmium pachyantholica* R.F.Castañeda & W.B.Kendr., *Neosporidesmium* sp., *Repetophragma ontariense* (Matsush.) W.P.Wu, and *Repetophragma goidanichii* (Rambelli) W.P.Wu have been shown to belong to the Dothideomycetes (Shenoy *et al.*, 2006).

*Aquaticheirospora lignicola* is clearly morphologically dissimilar to all previously described anamorphs within the Pleosporales, and both morphological and molecular characterization provides sufficient evidence to support this anamorphic fungus as a new genus. Attempts were made to induce the production of the sexual stage in culture, but no teleomorphs were observed after 45 days.

#### ACKNOWLEDGEMENTS

This research was funded by Hong Kong Research Grants Council no. HKU 7322/04M and CRCG 10205773 (awarded to Rajesh Jeewon and Kevin D. Hyde). The University of Hong Kong is thanked for providing facilities to enable the morphological and molecular characterization of this new genus. The

Chiang Mai University Graduate School (Thailand) is acknowledged for sponsoring R. Kodsueb to pursue her doctorate studies. Helen Leung, Heidi Kong, Shenoy D. Belle, and other colleagues from the University of Hong Kong are thanked for their assistance in the research.

## REFERENCES

- Aptroot A. 1998.** A world revision of *Massarina* (Ascomycota). *Nova Hedwigia* **66**: 89–162.
- Barr ME. 1992.** Notes on Lophiostomataceae (Pleosporales). *Mycotaxon* **45**: 191–221.
- Bose SK. 1961.** Studies on *Massarina* Sacc. and related genera. *Phytopathologische Zeitschrift* **41**: 151–213.
- Cai L, Jeewon R, Hyde KD. 2005.** Phylogenetic evaluation and taxonomic revision of *Schizothecium* based on ribosomal DNA and protein coding genes. *Fungal Diversity* **19**: 1–21.
- Cai L, Zhang KQ, McKenzie EHC, Hyde KD. 2003b.** Freshwater fungi from bamboo and wood submerged in the Liput River in the Philippines. *Fungal Diversity* **13**: 1–12.
- Cai L, Zhang KQ, McKenzie EHC, Lumyong S, Hyde KD. 2003a.** New species of *Canalisporium* and *Dictyosporium* from China and a note on the differences between these genera. *Cryptogamie Mycologie* **24**: 3–11.
- Choi YW, Hyde KD, Ho WH. 1999.** Single spore isolation of fungi. *Fungal Diversity* **3**: 29–38.
- Eriksson O, Hawksworth DL. 2003.** *Saccharicola*, a new genus for two *Leptosphaeria* species on sugarcane. *Mycologia* **95**: 426–433.
- Fryar SC, Booth W, Davies J, Hodgkiss IJ, Hyde KD. 2004a.** Distribution of fungi on wood in the Tutong River, Brunei. *Fungal Diversity* **17**: 17–38.
- Fryar SC, Booth W, Davies J, Hodgkiss IJ, Hyde KD. 2005.** Evidence of in situ competition between fungi in freshwater. *Fungal Diversity* **18**: 59–71.
- Fryar SC, Davies J, Booth W, Hodgkiss IJ, Hyde KD. 2004b.** Succession of fungi on dead and live wood in brackish water. *Mycologia* **96**: 219–225.
- Fryar SC, Hyde KD. 2004.** New species and genera of ascomycetes from fresh and brackish water in Brunei: *Ayria appendiculata* and *Sungaiicola bactrodesmiella* gen. et spp. nov., *Fluviatispora boothii*, *Torrentispora crassiparietis* and *T. fusiformis* spp. nov. *Cryptogamie Mycologie* **25**: 245–260.
- Goh TK. 1999.** A revision of the genus *Dictyosporium*, with descriptions of three new species. *Fungal Diversity* **2**: 65–100.
- Goh TK, Hyde KD. 1996.** Biodiversity of freshwater fungi. *Journal of Industrial Microbiology* **17**: 328–345.
- Gönzöl J, Révay A. 2003.** Treehole fungal communities: aquatic, aero-aquatic and dematiaceous hyphomycetes. *Fungal Diversity* **12**: 19–34.
- Gönzöl J, Révay A. 2004.** Fungal spores in rainwater: stem-flow, throughfall and gutter conidial assemblages. *Fungal Diversity* **16**: 67–86.
- Guo L, Xul L, Zheng W, Hyde KD. 2004.** Genetic variation of *Alternaria alternata*, an endophytic fungus isolated from *Pinus tabulaeformis* as determined by random amplified microsatellites (RAMS). *Fungal Diversity* **16**: 53–65.
- Hall TA. 1999.** BioEdit: a user-friendly biological sequence alignment editor and analysis program for Windows 95/98/NT. *Nucleic Acids Symposium Series* **41**: 95–98.
- Ho WH, Hodgkiss IJ, Hyde KD. 2000.** *Cheiromyces lignicola*, a new chirosporous anamorphic species from Hong Kong. *Mycologia* **92**: 582–588.
- Ho WH, Hyde KD, Hodgkiss IJ. 1999.** *Digitodesmium recurvum*, a new species of chirosporous hyphomycetes from Hong Kong. *Mycologia* **91**: 900–904.
- Ho WH, Hyde KD, Hodgkiss IJ. 2004.** *Cataractispora receptaculorum*, a new freshwater ascomycete from Hong Kong. *Mycologia* **96**: 411–417.
- Hyde KD. 1995.** The genus *Massarina* with a description of *M. eburnea* and an annotated list of *Massarina* names. *Mycological Research* **99**: 291–296.
- Jacobs KA, Rehner SA. 1998.** Comparison of cultural and morphological characters and ITS sequences in anamorphs of *Botryosphaeria* and related taxa. *Mycologia* **90**: 601–610.
- Jeewon R, Liew ECY, Cai L, Zhang KQ, Hyde KD. 2003b.** *Dyrithiopsis lakefuxianensis* gen. et sp. nov. from Fuxian Lake, Yunnan, China, and notes on the taxonomic confusion surrounding *Dyrithium*. *Mycologia* **95**: 911–920.
- Jeewon R, Liew ECY, Hyde KD. 2002.** Phylogenetic relationships of *Pestalotiopsis* and allied genera inferred from ribosomal DNA sequences and morphological characters. *Molecular Phylogenetics and Evolution* **25**: 378–392.
- Jeewon R, Liew ECY, Hyde KD. 2004.** Phylogenetic evaluation of species nomenclature of *Pestalotiopsis* in relation to host association. *Fungal Diversity* **17**: 39–55.
- Jeewon R, Liew ECY, Simpson JA, Hodgkiss IJ, Hyde KD. 2003a.** Phylogenetic significance of morphological characters in taxonomy of *Pestalotiopsis* species. *Molecular Phylogenetics and Evolution* **27**: 372–383.
- Kirk PM. 1981.** New or interesting microfungi II. Dematiaceous hyphomycetes from Esher Common, Surrey. *Transactions of British Mycological Society* **77**: 279–297.
- Kirk PM, Cannon PF, David JC, Stalpers JA. 2001.** *Ainsworth & Bisby's dictionary of the fungi*. 9th ed. Wallingford: CABI Publishing.
- Kirschner R, Piepenbring M. 2006.** A new fungicolous species of *Titaea* and new reports of *Bahusaganda indica* and *Exosporium ampullaceum* (hyphomycetes) from tropical rainforests in Panama. *Fungal Diversity* **21**: 93–103.
- Kodsueb R, Lumyong S, Lumyong P, McKenzie EHC, Ho WH, Hyde KD. 2004.** *Acanthostigma* and *Tubeufia* species, including *T. claspisphaeria* sp. nov. from submerged wood in Hong Kong. *Mycologia* **96**: 667–674.
- Lee HB, Kim KM, Jung HS. 2005.** *Paraphaeosphaeria recurvifoliae*, a new species causing leaf spots and necrosis on *Yucca recurvifolia*. *Fungal Diversity* **20**: 71–81.
- Liew ECY, Aptroot A, Hyde KD. 2002.** An evaluation of the monophyly of *Massarina* based on ribosomal DNA sequences. *Mycologia* **94**: 803–813.
- Luo J, Yin JF, Cai L, Zhang K, Hyde KD. 2004.** Freshwater fungi in Lake Dianchi, a heavily polluted lake in Yunnan, China. *Fungal Diversity* **16**: 93–112.



- Morales VM, Jasalavich CA, Pelcher LE, Petrie GA, Taylor JL. 1995.** Phylogenetic relationship among several *Leptosphaeria* species based on their ribosomal DNA sequences. *Mycological Research* **99**: 593–603.
- Morgan-Jones G, Nag Raj TR, Kendrick B. 1972.** Icones Generum Coelomycetum V. *University of Waterloo Biology Series* **7**: 33–34.
- Munk A. 1956.** On *Metasphaeria coccodes* (Karst.) Sacc. and other fungi probably related to *Massarina* Sacc. (Massariaceae n. fam.). *Friesia* **5**: 303–308.
- O'Neill NR, Farr DR. 1996.** *Miscanthus* blight, a new foliar disease of ornamental grasses and sugarcane incited by *Leptosphaeria* sp. and its anamorphic state *Stagonospora* sp. *Plant Disease* **80**: 980–987.
- Oliver C, Berbee ML, Shoemaker RA, Loria R. 2000.** Molecular phylogenetic supports from ribosomal DNA sequences for origin of *Helminthosporium* from *Leptosphaeria*-like loculoascomycete ancestors. *Mycologia* **92**: 736–746.
- Pascoal C, Marvanová L, Cássio F. 2005.** Aquatic hyphomycete diversity in streams of Northwest Portugal. *Fungal Diversity* **19**: 109–128.
- Phillips AJL, Oudemans PV, Correia A, Alves A. 2006.** Characterisation and epitypification of *Botryosphaeria corticis*, the cause of blueberry cane canker. *Fungal Diversity* **21**: 141–155.
- Pinnoi A, Jeewon R, Sakayaroj J, Hyde KD, Jones EBG. 2007.** *Berkleasium crunisia* sp. nov. and its teleomorphic affinities to the Pleosporales based on 18S, 28S and ITS–5.8S rDNA sequence analyses. *Mycologia* **99**: 378–384.
- Pinnoi A, Pinruan U, Hyde KD, Lumyong S. 2004.** *Submersisphaeria palmae* sp. nov. and key to the genus and notes on *Helicoubisia*. *Sydowia* **56**: 72–78.
- Pinruan U, McKenzie EHC, Jones EBG, Hyde KD. 2004b.** Two new species of *Stachybotrys*, and a key to the genus. *Fungal Diversity* **17**: 145–157.
- Pinruan U, Sakayaroj J, Jones EBG, Hyde KD. 2004a.** Aquatic fungi from peat swamp palms: *Phruensis brunneispora* gen. et sp. nov. and its hyphomycete anamorph. *Mycologia* **96**: 1163–1170.
- Rehner SA, Samuels GJ. 1995.** Molecular systematics of the Hypocreales: a teleomorph gene phylogeny and the status of their anamorphs. *Canadian Journal of Botany* **73**: S816–S823.
- Sakayaroj J, Phongpaichit S, Jones EBG. 2005.** Viability and biodiversity of freshwater hyphomycetes in foam at Ton Nga Chang Wildlife-Sanctuary, Songkhla, southern Thailand. *Fungal Diversity* **18**: 135–145.
- Schubert K, Braun U. 2005.** Taxonomic revision of the genus *Cladosporium* s.l. 4. Species reallocated to *Asperisporium*, *Dischloridium*, *Fusicladium*, *Passalora*, *Pseudoasperisporium* and *Stenella*. *Fungal Diversity* **20**: 187–208.
- Shearer CA. 1993.** The freshwater ascomycetes. *Nova Hedwigia* **56**: 1–33.
- Shenoy BD, Jeewon R, Wu WP, Bhat DJ, Hyde KD. 2006.** Ribosomal and RPB2 DNA sequence analyses suggest that *Sporidesmium* and morphologically similar genera are polyphyletic. *Mycological Research* **110**: 916–928.
- Shoemaker RA, Babcock CE. 1990.** *Massarina walkeri* sp., the teleomorph of *Acrocalymma medicaginis* from *Medicago sativa* contrasted with *Leptosphaeria pratensis*, *L. weimeri* sp. and *L. viridella*. *Canadian Journal of Botany* **69**: 569–573.
- Sivanesan A. 1984.** *The Bitunicates ascomycetes and their anamorphs*. Vaduz: J. Cramer.
- Sutton BC. 1980.** *The coelomycetes*. Kew: Commonwealth Mycological Institute.
- Sutton BC. 1985.** Notes on some deuteromycete genera with cheiroid or digitate brown conidia. *Proceedings of the Indian Academy of Science (Plant Science)* **94**: 229–244.
- Swofford DL. 2002.** PAUP\*. *Phylogenetic analysis using parsimony (\*and others methods)*, Version 4.0b10 Edition. Sunderland, MA: Sinauer Associates.
- Tanaka K, Harada Y, Barr ME. 2005.** *Trematosphaeria*: taxonomic concepts, new species from Japan and key to species. *Fungal Diversity* **19**: 145–156.
- Taylor JW. 1995.** Making the Deuteromycota redundant: a practical integration of mitosporic and meiosporic fungi. *Canadian Journal of Botany* **73**: S754–S759.
- Thompson JD, Gibson TJ, Plewniak F, Jeanmougin F, Higgins DG. 1997.** The Clustal X windows interface: flexible strategies for multiple sequence alignment aided by quality analysis tools. *Nucleic Acids Research* **24**: 4876–4882.
- Tsui CMK, Berbee ML, Jeewon R, Hyde KD. 2006.** Molecular phylogeny of *Dictyosporium* and allied genera inferred from ribosomal DNA. *Fungal Diversity* **21**: 157–166.
- Tsui CKM, Goh TK, Hyde KD. 2003.** Reflections on the genus *Vanakripa*, with a description of *V. ellipsoidea* sp. nov. *Mycologia* **95**: 124–127.
- Tsui CMK, Hodgkiss IJ. 2004.** Biodiversity of fungi on submerged wood in a stream and estuaries in the Tai Ho Bay, Hong Kong. *Fungal Diversity* **15**: 171–186.
- Tsui CKM, Hodgkiss IJ, Hyde KD. 2003.** Three new species of *Aquaticicola* (Ascomycetes) from tropical freshwater habitats. *Nova Hedwigia* **77**: 161–168.
- Tsui CMK, Hyde KD. 2004.** Biodiversity of fungi on submerged wood in a stream and estuary in the Tai Ho Bay, Hong Kong. *Fungal Diversity* **15**: 205–220.
- Venkatasubbaiah P, Kohmoto K, Otani H, Hamasaki T, Nakajima H, Hokama K. 1998.** Two phytotoxins from *Stagonospora sacchari* causing leaf scorch of sugarcane. *Annals of the Phytopathology Society of Japan* **53**: 335–344.
- Verkley GJM, da Silva M, Wicklow DT, Crous PW. 2004.** *Paraconiothyrium*, a new genus to accommodate the mycoparasite *Coniothyrium minitans*, anamorphs of *Paraphaeosphaeria*, and four new species. *Studies in Mycology* **50**: 323–335.
- Vijaykrishna D. 2005.** Freshwater fungi: biodiversity, origins and molecular taxonomy. DPhil Thesis, University of Hong Kong.
- Vijaykrishna D, Hyde KD. 2006.** Inter- and intra-stream variation of lignicolous freshwater fungi in tropical Australia. *Fungal Diversity* **21**: 203–224.

**Vilgalys R, Hester M. 1990.** Rapid genetic identification and mapping of enzymatically amplified ribosomal DNA from several *Cryptococcus* species. *Journal of Bacteriology* **172**: 4238–4246.

**White TJ, Bruns T, Lee S, Taylor J. 1990.** Amplification

and direct sequencing of fungal ribosomal RNA genes for phylogenetics. In: Innis MA, Gelfand DH, Sninsky JJ, White TJ, eds. *PCR protocols. A guide to methods and applications*. San Diego, CA: Academic Press, 315–322.
